# Supplementary material
Source: publisher site journal article supplement (https://www.kjim.org/upload/media/kjim-2023-307-Supplementary-Table-2.pdf)
Supplement: Supplementary file 1 [file kjim-2023-307-Supplementary-Table-2.pdf]

**Supplementary Table 2. Characteristics of the participants according to the presence or absence of typical chest pain**

| Characteristic          | Patients without typical chest pain (n = 803) | Patients with typical chest pain (n = 3,652) | p value |
|-------------------------|-----------------------------------------------|----------------------------------------------|---------|
| SDT, day                | 1.983 ± 5.145                                 | 1.160 ± 7.588                                | < 0.001 |
| Sex                     |                                               |                                              | < 0.001 |
| Male                    | 503 (62.6)                                    | 2,601 (71.2)                                 |         |
| Female                  | 300 (37.4)                                    | 1,051 (23.6)                                 |         |
| Age, yr                 | 68.96 ± 10.76                                 | 64.52 ± 11.63                                | < 0.001 |
| Age ≥ 75 yr             | 275 (34.2)                                    | 802 (22.0)                                   | < 0.001 |
| EMS utilization         | 137 (17.1)                                    | 534 (14.6)                                   | 0.08    |
| Final diagnosis         |                                               |                                              | < 0.001 |
| STEMI                   | 235 (29.3)                                    | 1,716 (47.0)                                 |         |
| NSTEMI                  | 568 (70.7)                                    | 1,936 (53.0)                                 |         |
| Killip functional class |                                               |                                              | < 0.001 |
| I–II                    | 502 (62.5)                                    | 3,159 (86.5)                                 |         |
| III–IV                  | 301 (37.5)                                    | 493 (13.5)                                   |         |
| In-hospital death       | 86 (10.7)                                     | 132 (3.6)                                    | < 0.001 |

Values are presented as number (percentage) for categorical values and mean ± standard deviation for continuous variables.

EMS, emergency medical service; NSTEMI, non-ST-elevation myocardial infarction; STEMI, ST-elevation myocardial infarction; SDT, symptom-to-door time.
